# Supplementary material for: Enhanced photocatalytic performance of ZnO/AgCl composites prepared by high-energy mechanical ball milling
Source: Royal Society of Chemistry journal article supplement (doi:10.1039/d2nj00798c), 2022-01-01
Supplement: d2nj00798c1.pdf [file d2nj00798c1.pdf]

## Supporting Information

### **Enhanced Photocatalytic Performance of ZnO/AgCl Composites Prepared by High-Energy Mechanical Ball Milling**

Xuemei Tian<sup>a</sup>, Hanliu Wu<sup>a</sup>, Xiaoyan Hu<sup>a</sup>, Zhonghua Wang<sup>a\*</sup>, Chunguang Ren<sup>b\*\*</sup>, Zhengjun Cheng<sup>a</sup>, Lin Dou<sup>c</sup>, Ying-Wu Lin<sup>d</sup>

<sup>a</sup> Chemical Synthesis and Pollution Control Key Laboratory of Sichuan Province, College of Chemistry and Chemical Engineering, China West Normal University, Nanchong 637002, Sichuan, China

<sup>b</sup> Yantai Institute of Materia Medica, Yantai 264000, Shandong, China.

<sup>c</sup> Key Laboratory of Green Chemistry of Sichuan Institutes of Higher Education, College of Chemistry and Environmental Engineering, Sichuan University of Science and Engineering, Zigong 643000, Sichuan, China

<sup>d</sup> School of Chemistry and Chemical Engineering, University of South China, Hengyang 421001, Hunan, China

\*Corresponding author, Email: zhwangs@163.com (Z. Wang),

Tel: (+86) 817-2568081, Fax: (+86) 817-2445233.

\*\*Corresponding author, Email: cgren@yimm.ac.cn (C. Ren)

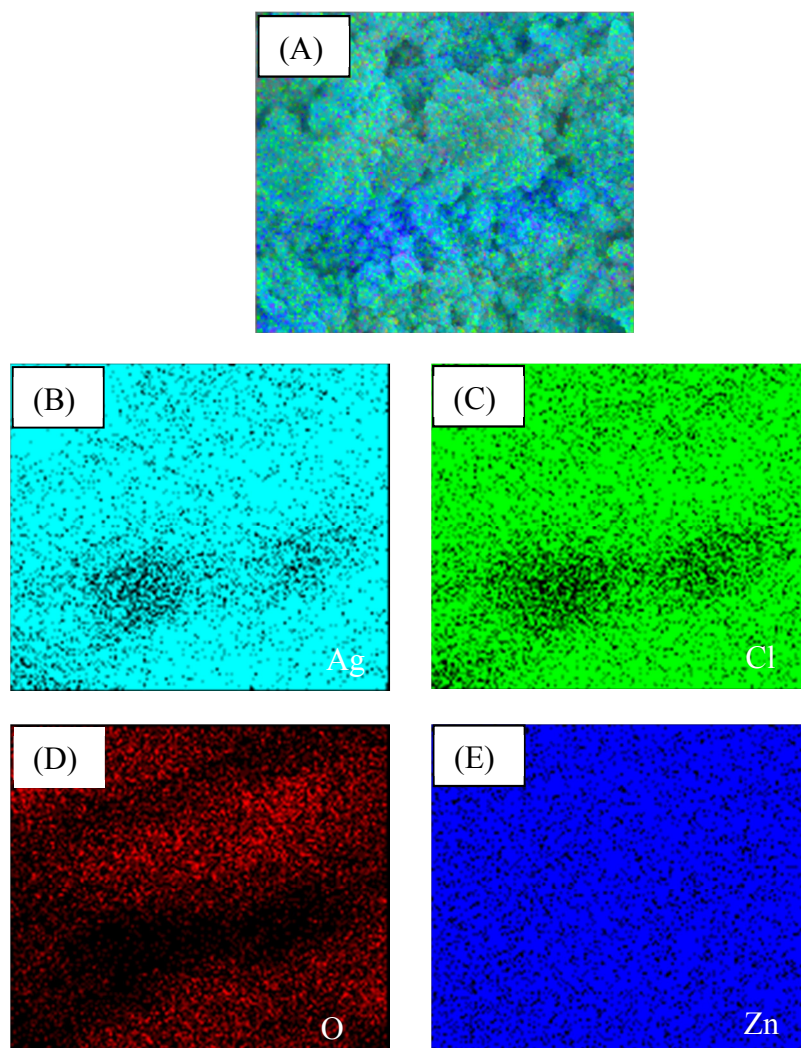

Fig. S1 SEM image of mapping area (A), EDS elements mapping of Ag (B), Cl (C), O (D) and Zn (E) of the BM-ZA-60% sample.

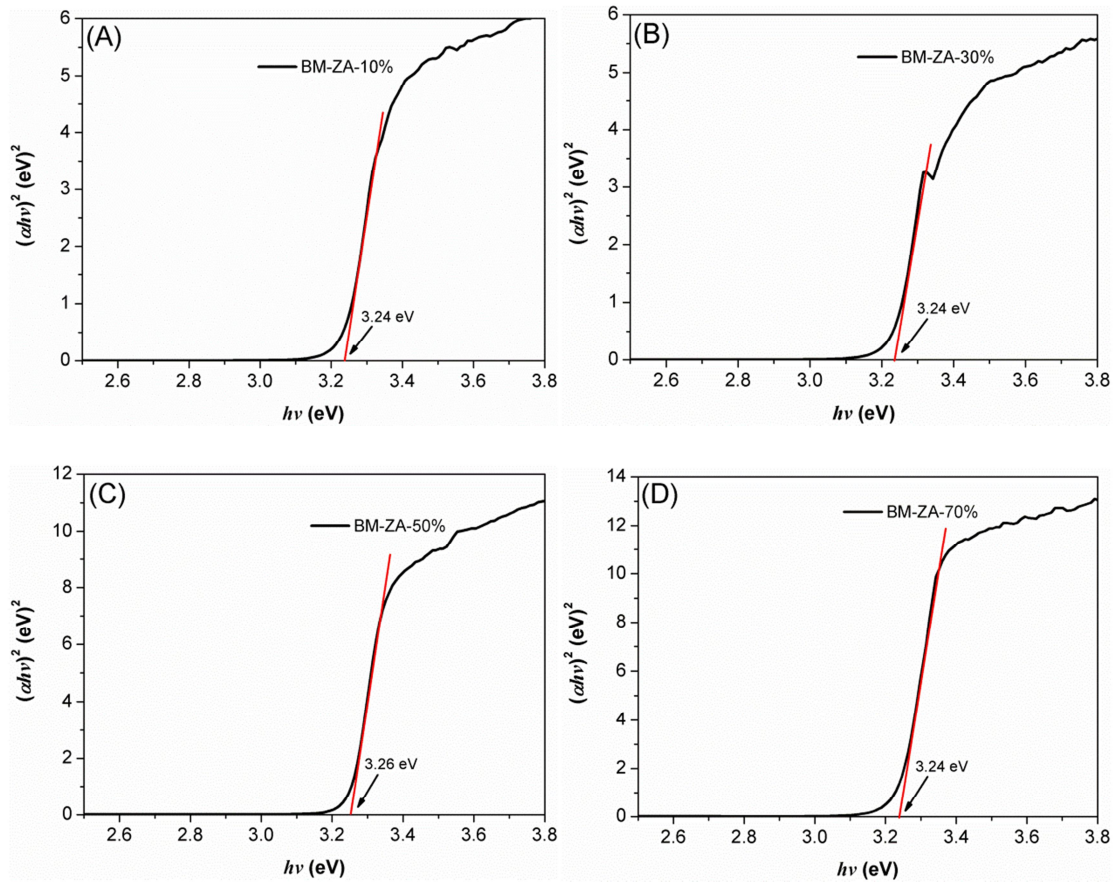

Fig. S2 Calculated band gap of BM-ZA-10% (A), BM-ZA-30% (B), BM- ZA-50% (C) and BM-ZA-70% (D) with  $(\alpha h\nu)^2$  graph of relationship with energy ( $h\nu$ ).

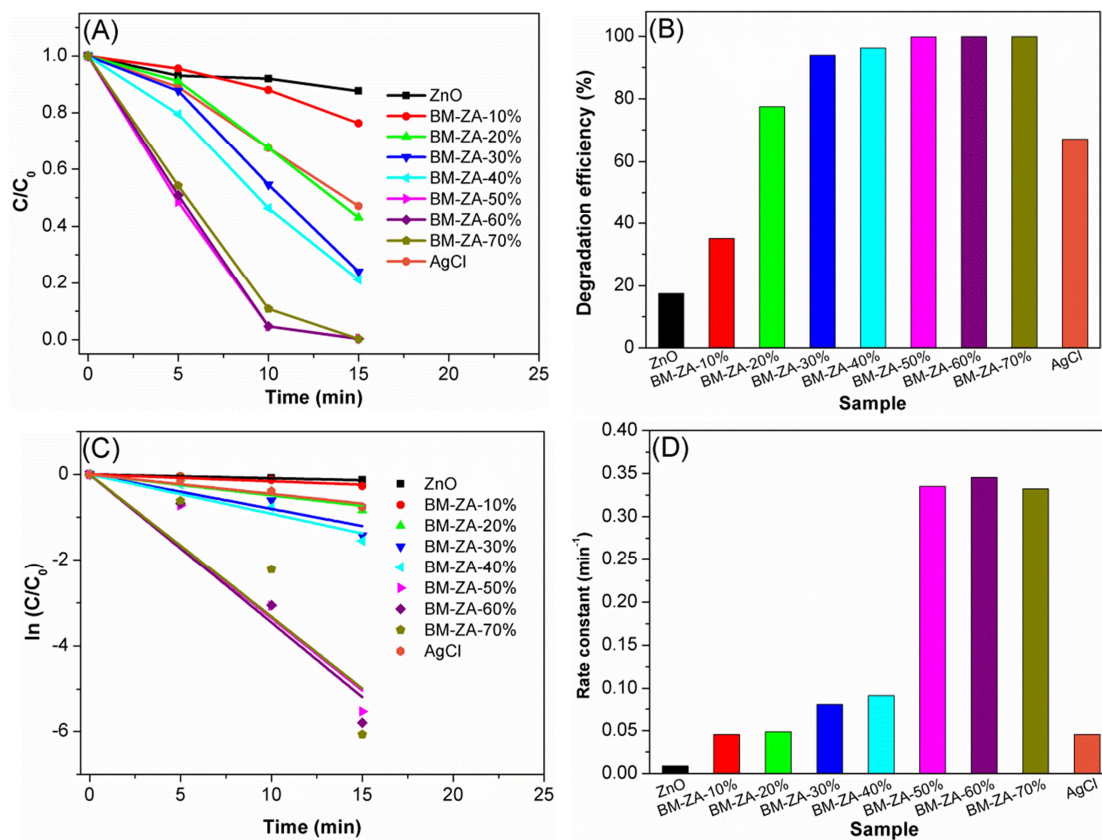

Fig. S3 ZnO, AgCl and BM-ZA- $x$ % photocatalytic degradation of RhB under visible light: (A) Kinetic diagram, (B) Degradation efficiency graph, (C) The linear kinetic fitting graph, (D) Comparison of the pseudo first-order rate constants.

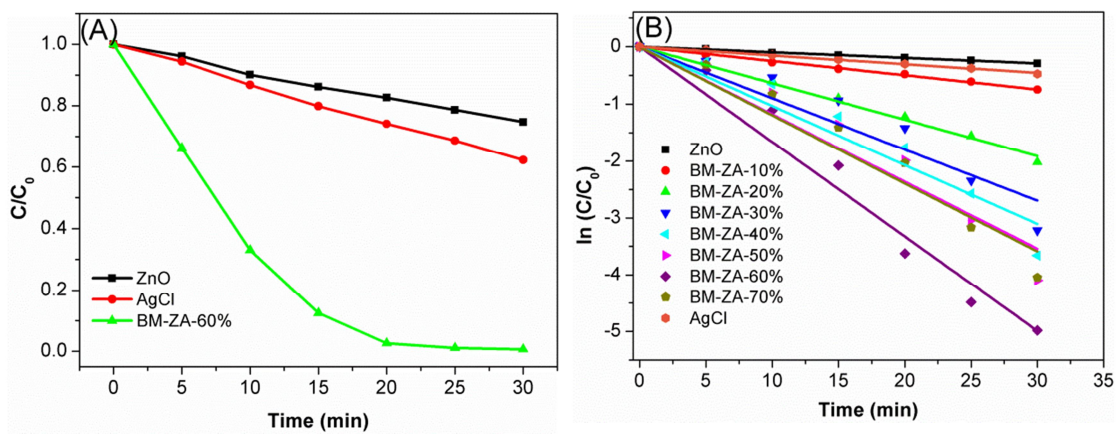

Fig. S4 Photo-dehydrogenation of 1,4-DHP under visible light: (A) Kinetic diagram of ZnO, AgCl and BM-ZA-60%; (B) The linear kinetic fitting graph of ZnO, AgCl and BM-ZA-x%.



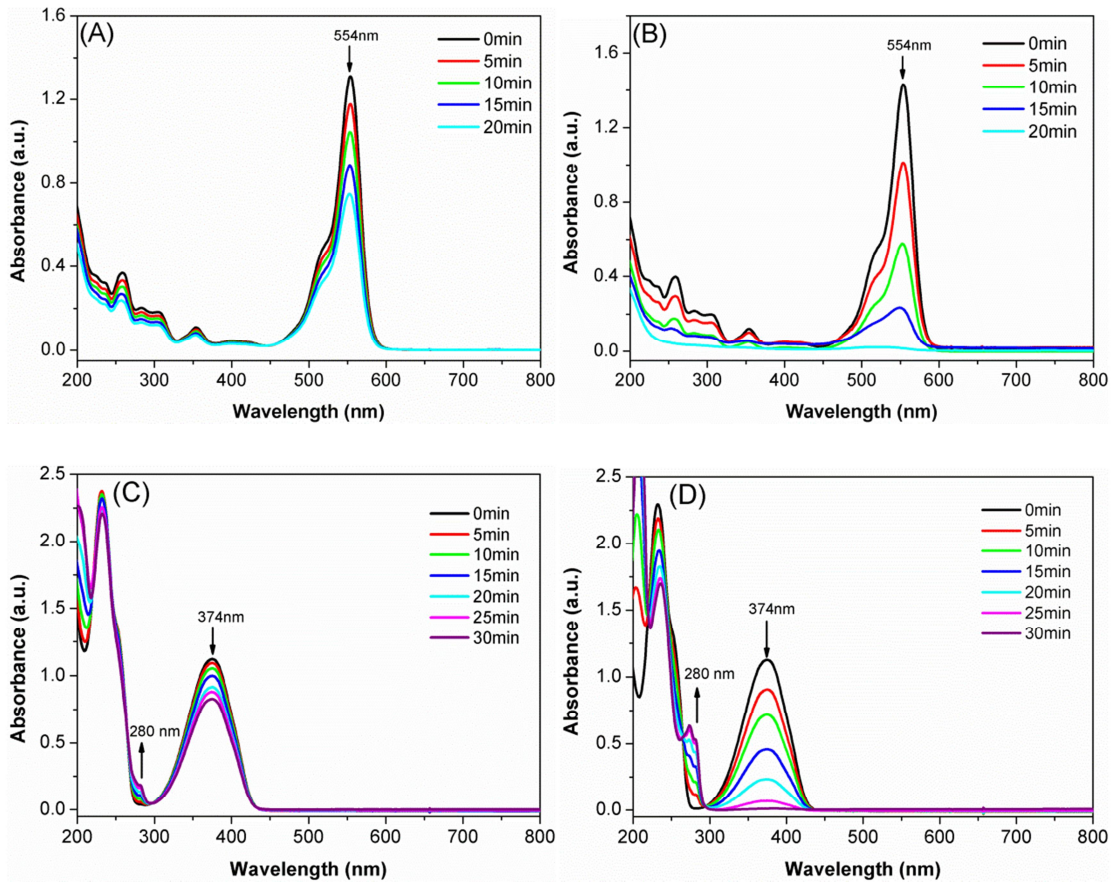

Fig. S5 The UV-Vis spectra changes of RhB solution under visible light irradiation ( $\lambda \geq 400$  nm) in the presence of different photocatalysts: (A) SM-ZA-60%, (B) DP-ZA-60%; The UV-Vis spectra changes of 1,4-DHP solution under visible light irradiation ( $\lambda \geq 400$  nm) in the presence of different photocatalysts: (C) SM-ZA-60%, (D) DP-ZA-60%.

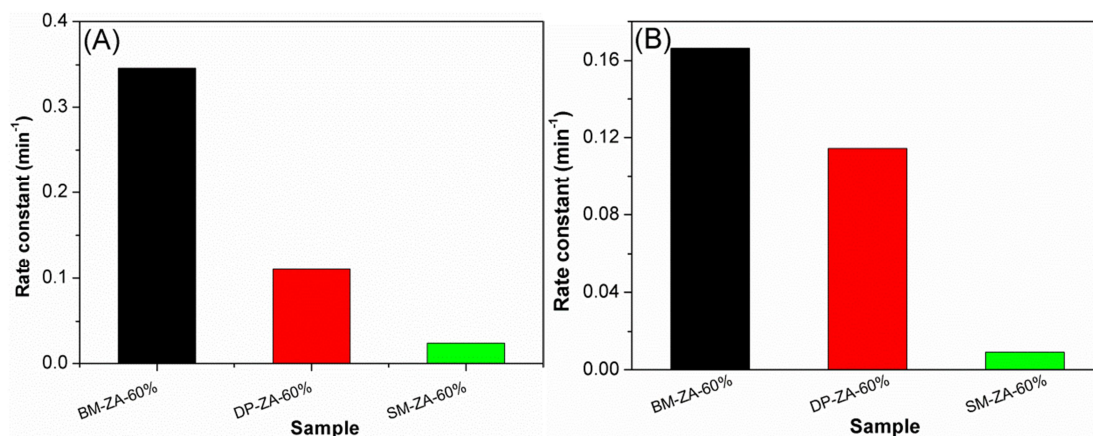

Fig. S6 (A) Comparison of the pseudo first-order rate constants of photodegradation of RhB with ZnO, AgCl, BM-ZA-60%, DP-ZA-60% and SM-ZA-60%; (B) Comparison of the pseudo first-order rate constants of photooxidation of 1,4-DHP with ZnO, AgCl, BM-ZA-60%, DP-ZA-60% and SM-ZA-60%.

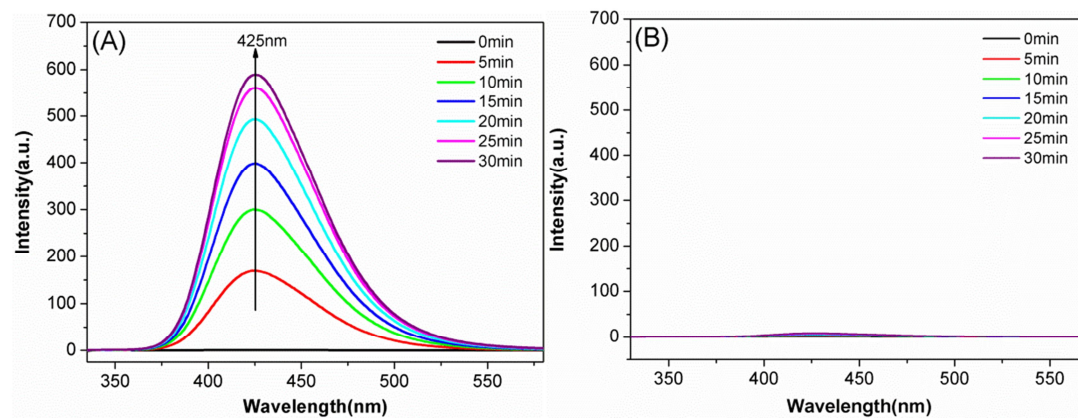

Fig. S7 The fluorescence spectra changes of TA alkaline solution in the presence of TiO<sub>2</sub> (A) and BM-ZA-60% (B).
